# Supplementary material for: Bayesian methods for expression-based integration of various types of genomics data
Source: Springer Nature journal article supplement (doi:10.1186/1687-4153-2013-13), 2013-09-21

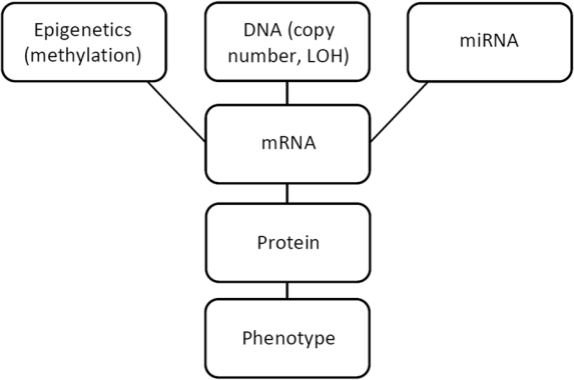

Supplement: 13637_2013_38_MOESM1_ESM.pdf [file 13637_2013_38_MOESM1_ESM.pdf]
